# Supplementary material for: Impact of Initial Treatment Policies on Long-term Complications and Costs in Japanese Patients with Type 2 Diabetes: A Real-World Database Study
Source: PubMed Central journal article supplement — Diabetes Ther. 2024 Jun 25;15(8):1811–20. doi: 10.1007/s13300-024-01611-9 (PMC11263455; doi:10.1007/s13300-024-01611-9), 2024-06-25
Supplement: 13300_2024_1611_MOESM1_ESM.pdf [file 13300_2024_1611_MOESM1_ESM.pdf]

# Impact of Initial Treatment Policies on Long-term Complications and Costs in Japanese Type 2 Diabetes Patients: A Real-world Database Study

## Authors:

Hiroshi Yoshihara <sup>1</sup>

Ataru Igarashi <sup>1</sup>

Toru Tonoike <sup>2</sup>

Hiromitsu Ono <sup>2</sup>

Susumu Nishiuchi <sup>2</sup>

*1 Department of Health Economics and Outcomes Research, Graduate School of Pharmaceutical Sciences, The University of Tokyo, Tokyo, JAPAN*

*2 Allied Medical K.K., Tokyo, JAPAN*

## Address for correspondence:

Hiroshi Yoshihara MS

Department of Health Economics and Outcomes Research, Graduate School of Pharmaceutical Sciences, The University of Tokyo

Address: 7-3-1, Hongo, Bunkyo-ku, Tokyo 113-0033, Japan

Telephone: +81 3-5841-4828

Email: [hiroshechka-yoshihara@g.ecc.u-tokyo.ac.jp](mailto:hiroshechka-yoshihara@g.ecc.u-tokyo.ac.jp)

# Supplementary Figure S1. Results of sensitivity analysis

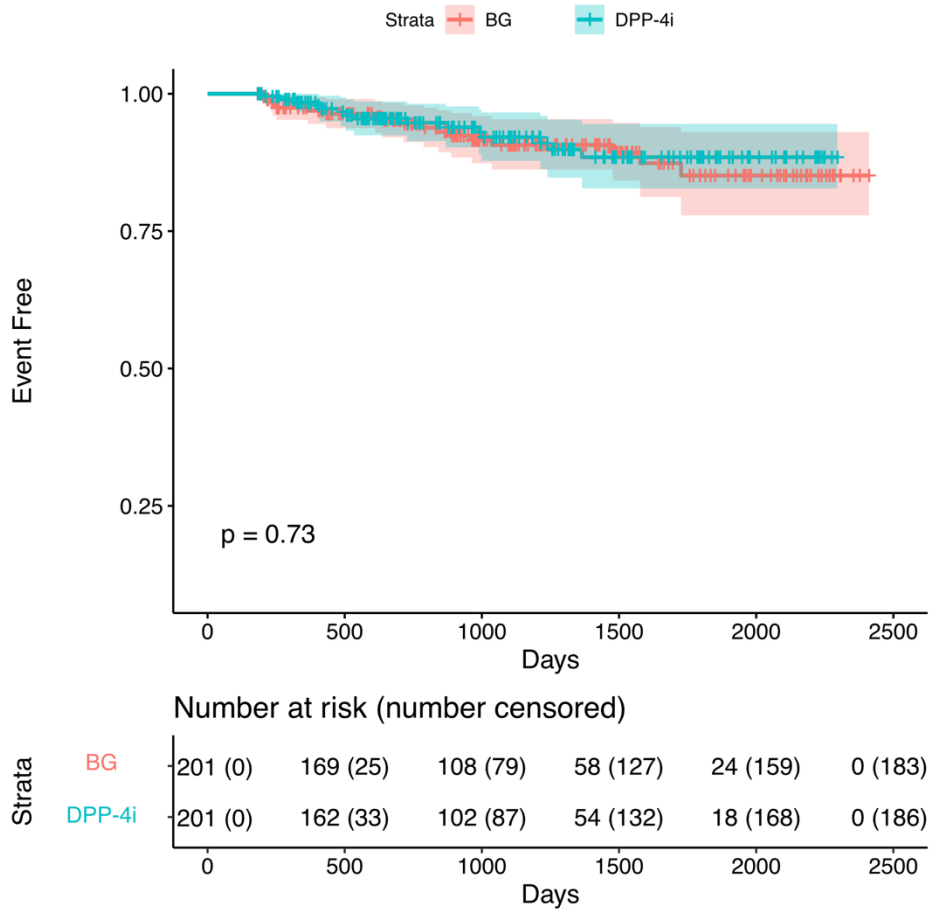

Supplementary Figure S2. Survival analysis of cardiac events

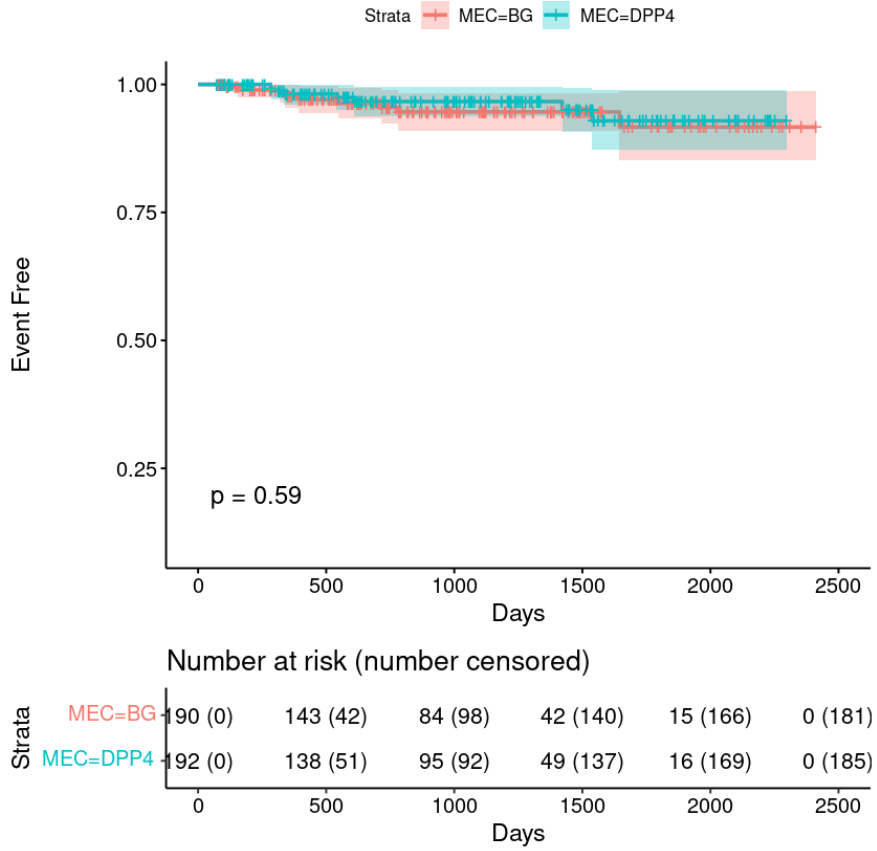

### Supplementary Figure S3. Survival analysis of hepatic events

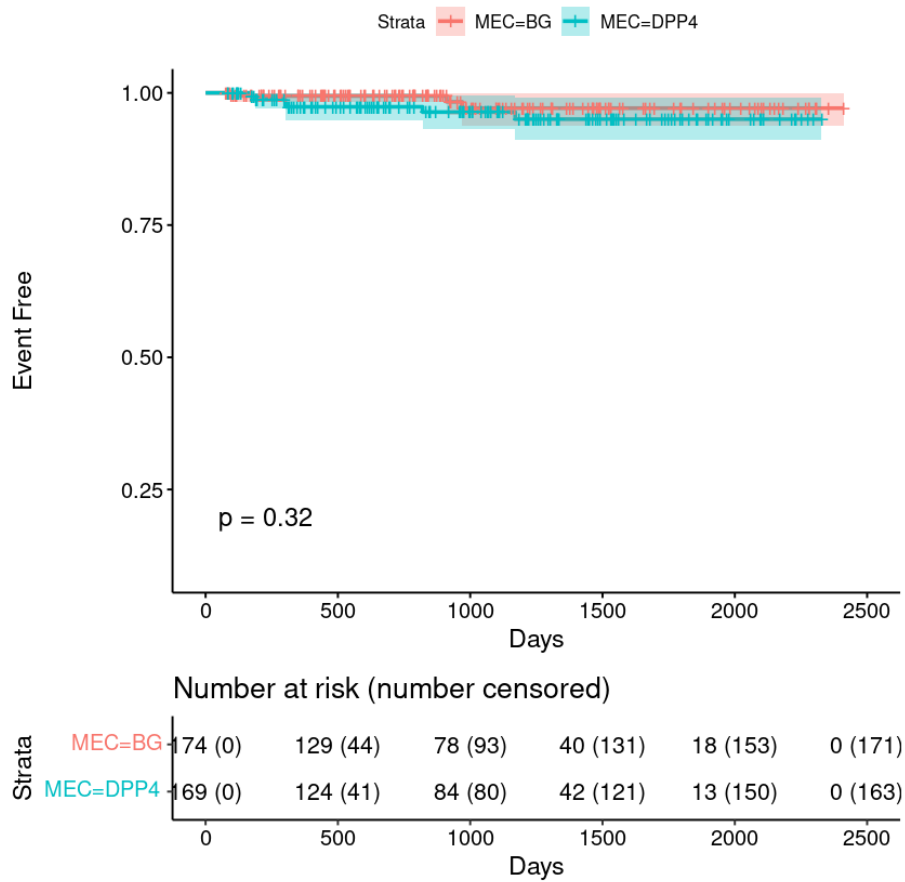

### Supplementary Table S1. List of diabetes-related complications

| Event category      | Event name                         | ICD-10 |
|---------------------|------------------------------------|--------|
| Renal complications | Diabetic Nephropathy               | E142   |
|                     | Type 2 Diabetic Nephropathy        | E112   |
|                     | Type 2 Diabetic Glomerulosclerosis | E112   |
|                     | Type 2 Diabetic Renal Failure      | E112   |
|                     | Diabetic Kidney Disease            | E142   |
|                     | Kimmelstiel-Wilson Syndrome        | E142   |
|                     | Acute Tubular Necrosis             | N170   |
|                     | Acute Renal Failure                | N179   |
|                     | Chronic Kidney Disease             | N289   |
|                     | End-Stage Renal Disease            | N180   |
|                     | Renal Anemia                       | N19    |
|                     | Renal Osteodystrophy               | E146   |

|                                             |                                       |                                             |
|---------------------------------------------|---------------------------------------|---------------------------------------------|
|                                             | Renal Edema                           | R609                                        |
| <b>Neurological complications</b>           | Type 2 Diabetic Myopathy              | E114                                        |
|                                             | Type 2 Diabetic Neuropathy            | E114                                        |
|                                             | Type 2 Diabetic Polyneuropathy        | E114                                        |
|                                             | Type 2 Diabetic Mononeuropathy        | E114                                        |
|                                             | Type 2 Diabetic Peripheral Neuropathy | E114                                        |
|                                             | Type 2 Diabetic Neurogenic Bladder    | E114                                        |
|                                             | Type 2 Diabetic Neuralgia             | E114                                        |
|                                             | Type 2 Diabetic Autonomic Neuropathy  | E114                                        |
|                                             | Type 2 Diabetic Muscle Atrophy        | E114                                        |
|                                             | Diabetic Neuropathic Pain             | E144                                        |
|                                             | Diabetic Neuropathy                   | E144                                        |
|                                             | Diabetic Polyneuropathy               | E144                                        |
|                                             | Diabetic Mononeuropathy               | E144                                        |
|                                             | Diabetic Peripheral Neuropathy        | E144                                        |
|                                             | Diabetic Autonomic Neuropathy         | E144                                        |
|                                             | Diabetic Neuralgia                    | E144                                        |
|                                             | Diabetic Muscle Atrophy               | E144                                        |
|                                             | Uremic Neuropathy                     | N188                                        |
|                                             | Uremic Polyneuropathy                 | N188                                        |
|                                             | <b>Vascular complications</b>         | Type 2 Diabetic Peripheral Vascular Disease |
| Type 2 Diabetic Arteriosclerosis            |                                       | E115                                        |
| Type 2 Diabetic Arterial Occlusion          |                                       | E115                                        |
| Type 2 Diabetic Vascular Damage             |                                       | E115                                        |
| Type 2 Diabetic Peripheral Arterial Disease |                                       | E115                                        |
| Type 2 Diabetic Gangrene                    |                                       | E115                                        |
| Type 2 Diabetic Ulcer                       |                                       | E115                                        |
| Diabetic Arterial Occlusion                 |                                       | E145                                        |
| Diabetic Gangrene                           |                                       | E145                                        |
| Diabetic Vascular Damage                    |                                       | E145                                        |
| Diabetic Peripheral Vascular Disease        |                                       | E145                                        |
| Diabetic Peripheral Arterial Disease        |                                       | E145                                        |
| Diabetic Ulcer                              |                                       | E145                                        |
| Diabetic Arteriosclerosis                   |                                       | E145                                        |
| <b>Ocular complications</b>                 | Type 2 Diabetic Retinopathy           | E113                                        |
|                                             | Type 2 Diabetic Maculopathy           | E113                                        |
|                                             | Type 2 Diabetic Eye Muscle Paralysis  | E113                                        |
|                                             | Type 2 Diabetic Iritis                | E113                                        |
|                                             | Type 2 Diabetic Central Retinalopathy | E113                                        |

|                            |                                                         |      |
|----------------------------|---------------------------------------------------------|------|
|                            | Proliferative Diabetic Retinopathy with Type 2 Diabetes | E113 |
|                            | Type 2 Diabetic Cataract                                | E113 |
|                            | Type 2 Diabetic Macular Edema                           | E113 |
|                            | Diabetic Maculopathy                                    | E143 |
|                            | Diabetic Retinopathy                                    | E143 |
|                            | Diabetic Iritis                                         | E143 |
|                            | Diabetic Cataract                                       | E143 |
|                            | Proliferative Diabetic Retinopathy                      | E143 |
|                            | Diabetic Central Retinopathy                            | E143 |
|                            | Diabetic Eye Muscle Paralysis                           | E143 |
|                            | Diabetic Macular Edema                                  | E143 |
|                            | Renal Retinopathy                                       | N188 |
| <b>Skin complications</b>  | Type 2 Diabetic Dermopathy                              | E116 |
|                            | Type 2 Diabetic Pruritus                                | E116 |
|                            | Type 2 Diabetic Bullae                                  | E116 |
|                            | Type 2 Diabetic Scleredema                              | E116 |
|                            | Diabetic Dermopathy                                     | E146 |
|                            | Diabetic Pruritus                                       | E146 |
|                            | Diabetic Bullae                                         | E146 |
|                            | Diabetic Scleredema                                     | E146 |
| <b>Other complications</b> | Type 2 Diabetes with Comorbidities                      | E116 |
|                            | Type 2 Diabetic Hyperosmolar Hyperglycemic Syndrome     | E116 |
|                            | Type 2 Diabetic Gastroenteropathy                       | E116 |
|                            | Type 2 Diabetic Mental Disorders                        | E116 |
|                            | Type 2 Diabetic Liver Disorders                         | E116 |
|                            | Type 2 Diabetic Arthropathy                             | E116 |
|                            | Type 2 Diabetic Hypercholesterolemia                    | E116 |
|                            | Hyperosmolar Nonketotic Coma                            | E140 |
|                            | Diabetic Coma                                           | E140 |
|                            | Shock Kidney                                            | N170 |
|                            | Acute Prerenal Renal Failure                            | N178 |
|                            | Acute Postrenal Renal Failure                           | N178 |
|                            | Acute Uric Acid Nephropathy                             | N179 |
|                            | Acute Cortical Necrosis                                 | N171 |
|                            | Medullary Necrosis                                      | N172 |
|                            | Papillary Necrosis                                      | N172 |
|                            | Uremic Myocarditis                                      | N188 |
|                            | Uremic Pneumonia                                        | N188 |
|                            | Uremic Encephalopathy                                   | N188 |

|                                 |      |
|---------------------------------|------|
| Uremic Pericarditis             | N188 |
| Adrenal Insufficiency           | E274 |
| Adrenal Hyperfunction           | E270 |
| Adrenal Medullary Hyperfunction | E275 |
| Adrenal Crisis                  | E272 |
| Renal Failure                   | N19  |
| Nonfunctional Kidney            | N19  |

## Supplementary Table S2. List of hepatic events

| <b>Event name</b>                           | <b>ICD-10</b> |
|---------------------------------------------|---------------|
| <b>Cirrhosis</b>                            | K741          |
| <b>Liver Infarction</b>                     | K763          |
| <b>Liver Cirrhosis</b>                      | K746          |
| <b>Hepatocellular Jaundice</b>              | K729          |
| <b>Liver Disease</b>                        | K769          |
| <b>Anemia Associated with Liver Disease</b> | K769          |
| <b>Perihepatic Abscess</b>                  | K750          |
| <b>Hepatic Hemorrhage</b>                   | K768          |
| <b>Hepatic Tumor</b>                        | K768          |
| <b>Liver Disorder</b>                       | K769          |
| <b>Primary Biliary Cirrhosis</b>            | K743          |
| <b>Zieve's Syndrome</b>                     | K700          |
| <b>Autoimmune Hepatitis</b>                 | K754          |
| <b>Cholestatic Hepatitis</b>                | K758          |
| <b>Biliary Cirrhosis</b>                    | K745          |
| <b>Unilobular Cirrhosis</b>                 | K743          |
| <b>Macronodular Cirrhosis</b>               | K746          |
| <b>Compensated Cirrhosis</b>                | K746          |
| <b>Decompensated Cirrhosis</b>              | K746          |
| <b>Nonspecific Reactive Hepatitis</b>       | K752          |
| <b>Nodular Cirrhosis</b>                    | K746          |
| <b>Acute Hepatic Atrophy</b>                | K720          |
| <b>Acute Hepatitis</b>                      | K720          |
| <b>Acute Liver Failure</b>                  | K720          |
| <b>Acute Drug-Induced Liver Failure</b>     | K711          |
| <b>Alcoholic Hepatitis</b>                  | K701          |
| <b>Alcoholic Cirrhosis</b>                  | K703          |
| <b>Alcoholic Liver Disease</b>              | K709          |
| <b>Alcoholic Liver Failure</b>              | K704          |

|                                                       |      |
|-------------------------------------------------------|------|
| <b>Alcoholic Fatty Liver</b>                          | K700 |
| <b>Allergic Hepatitis</b>                             | K768 |
| <b>Atrophic Cirrhosis</b>                             | K746 |
| <b>Subacute Alcoholic Liver Failure</b>               | K704 |
| <b>Subacute Hepatitis</b>                             | K720 |
| <b>Congestive Liver</b>                               | K761 |
| <b>Congestive Hepatitis</b>                           | K759 |
| <b>Congestive Cirrhosis</b>                           | K761 |
| <b>Nutritional Cirrhosis</b>                          | K746 |
| <b>Post-necrotic Cirrhosis</b>                        | K746 |
| <b>Acute Alcoholic Hepatitis</b>                      | K701 |
| <b>Acute Alcoholic Liver Failure</b>                  | K704 |
| <b>Multiple Hepatic Abscesses</b>                     | K750 |
| <b>Hepatic Vein Thrombosis (Budd-Chiari Syndrome)</b> | K765 |
| <b>Hepatorenal Syndrome</b>                           | K767 |
| <b>Hepatic Coma</b>                                   | K729 |
| <b>Hepatic Encephalopathy</b>                         | K729 |
| <b>Liver Fibrosis</b>                                 | K740 |
| <b>Hepatic Purpura</b>                                | K764 |
| <b>Intrahepatic Cholestasis</b>                       | K710 |
| <b>Intrahepatic Obstructive Jaundice</b>              | K710 |
| <b>Hepatic Cyst</b>                                   | K768 |
| <b>Hepatic Abscess</b>                                | K750 |
| <b>Hepatic Edema</b>                                  | K768 |
| <b>Liver Failure</b>                                  | K729 |
| <b>Cruveilhier-Baumgarten Syndrome</b>                | K766 |
| <b>Fatty Liver</b>                                    | K760 |
| <b>Charcot's Cirrhosis</b>                            | K743 |
| <b>Mixed Cirrhosis</b>                                | K746 |
| <b>Bacterial Hepatic Abscess</b>                      | K750 |
| <b>Cholangitic Hepatic Abscess</b>                    | K750 |
| <b>Cholangiocellular Cirrhosis</b>                    | K745 |
| <b>Persistent Hepatitis</b>                           | K739 |
| <b>Micronodular Cirrhosis</b>                         | K746 |
| <b>Pediatric Hepatitis</b>                            | K759 |
| <b>Multiple Hepatic Hemangiomas</b>                   | K764 |
| <b>Lipoid Hepatitis</b>                               | K754 |
| <b>Idiopathic Cirrhosis</b>                           | K746 |
| <b>Idiopathic Portal Hypertension</b>                 | K766 |
| <b>Todd's Cirrhosis</b>                               | K743 |



|                                                               |      |
|---------------------------------------------------------------|------|
| <b>Granulomatous Hepatitis</b>                                | K753 |
| <b>Secondary Biliary Cirrhosis</b>                            | K744 |
| <b>Infantile Hepatitis</b>                                    | K759 |
| <b>Septal Cirrhosis</b>                                       | K746 |
| <b>Central Hemorrhagic Liver Necrosis</b>                     | K762 |
| <b>Toxic Hepatitis</b>                                        | K716 |
| <b>Toxic Hepatic Localized Nodular Hyperplasia</b>            | K718 |
| <b>Toxic Liver Injury</b>                                     | K719 |
| <b>Toxic Hepatic Venous Occlusive Disease</b>                 | K718 |
| <b>Toxic Hepatic Purpura</b>                                  | K718 |
| <b>Toxic Hepatic Granuloma</b>                                | K718 |
| <b>Chronic Alcoholic Liver Failure</b>                        | K704 |
| <b>Chronic Hepatitis</b>                                      | K739 |
| <b>Exacerbation of Chronic Hepatitis</b>                      | K739 |
| <b>Chronic Liver Failure</b>                                  | K721 |
| <b>Chronic Persistent Hepatitis</b>                           | K730 |
| <b>Obstructive Cirrhosis</b>                                  | K744 |
| <b>Chronic Inactive Hepatitis</b>                             | K738 |
| <b>Chronic Nonsuppurative Destructive Cholangitis</b>         | K743 |
| <b>Chronic Drug-Induced Liver Failure</b>                     | K711 |
| <b>Portal Hypertension</b>                                    | K766 |
| <b>Pylephlebitis</b>                                          | K751 |
| <b>Pylephlebitic Hepatic Abscess</b>                          | K750 |
| <b>Portal Vein Dilatation</b>                                 | K766 |
| <b>Periportal Cirrhosis</b>                                   | K746 |
| <b>Portal Cirrhosis</b>                                       | K746 |
| <b>Drug-Induced Hepatitis</b>                                 | K716 |
| <b>Drug-Induced Liver Injury</b>                              | K719 |
| <b>Alcohol-Related Liver Damage</b>                           | K709 |
| <b>Chronic Alcohol-Related Liver Damage</b>                   | K709 |
| <b>Non-Alcoholic Steatohepatitis (NASH)</b>                   | K760 |
| <b>Decompensated Alcoholic Cirrhosis</b>                      | K703 |
| <b>Esophageal Varices Associated with Alcoholic Cirrhosis</b> | K703 |
| <b>Esophageal Varices Associated with Cirrhosis</b>           | K746 |
| <b>Portal Hypertensive Gastroenteropathy</b>                  | K766 |
| <b>Portal Hypertensive Enteropathy</b>                        | K766 |
| <b>Shock Liver</b>                                            | K768 |
| <b>Byler Disease</b>                                          | K710 |
| <b>Hepatic Hydrothorax</b>                                    | K769 |
| <b>Portal Hypertensive Gastropathy</b>                        | K766 |

|                                                                                    |      |
|------------------------------------------------------------------------------------|------|
| <b>Symptomatic Primary Biliary Cirrhosis</b>                                       | K743 |
| <b>Acute Liver Failure with Coma</b>                                               | K720 |
| <b>Hepatopulmonary Syndrome</b>                                                    | K768 |
| <b>Progressive Familial Intrahepatic Cholestasis</b>                               | K710 |
| <b>Progressive Familial Intrahepatic Cholestasis Type 1</b>                        | K710 |
| <b>Progressive Familial Intrahepatic Cholestasis Type 2</b>                        | K710 |
| <b>Progressive Familial Intrahepatic Cholestasis Type 3</b>                        | K710 |
| <b>Chronic Drug-Induced Hepatitis</b>                                              | K713 |
| <b>Asymptomatic Primary Biliary Cirrhosis</b>                                      | K743 |
| <b>Acute Drug-Induced Hepatitis</b>                                                | K712 |
| <b>Fulminant Drug-Induced Hepatitis</b>                                            | K711 |
| <b>Alcoholic Liver Fibrosis</b>                                                    | K702 |
| <b>Hepatic Granuloma</b>                                                           | K753 |
| <b>Autoimmune Cirrhosis</b>                                                        | K746 |
| <b>Severe Autoimmune Hepatitis</b>                                                 | K754 |
| <b>Primary Sclerosing Cholangitis</b>                                              | K743 |
| <b>Symptomatic Primary Sclerosing Cholangitis</b>                                  | K743 |
| <b>Asymptomatic Primary Sclerosing Cholangitis</b>                                 | K743 |
| <b>Drug-Induced Cirrhosis</b>                                                      | K717 |
| <b>Esophageal Variceal Bleeding Associated with Alcoholic Cirrhosis</b>            | K703 |
| <b>Esophageal Variceal Bleeding Associated with Cirrhosis</b>                      | K746 |
| <b>Esophageal Varices Associated with Primary Sclerosing Cholangitis</b>           | K743 |
| <b>Esophageal Variceal Bleeding Associated with Primary Sclerosing Cholangitis</b> | K743 |
| <b>Hepatic Central Vein Occlusion</b>                                              | K768 |
| <b>Active Chronic Hepatitis</b>                                                    | K732 |
| <b>Pyogenic Liver Abscess</b>                                                      | K750 |
| <b>Hepatic Atrophy</b>                                                             | K729 |
| <b>Hepatic Necrosis</b>                                                            | K729 |
| <b>Post-hepatitic Cirrhosis</b>                                                    | K746 |
| <b>Hepatoptosis</b>                                                                | K768 |
| <b>Hepatic Dysfunction</b>                                                         | K769 |
| <b>Hepatic Localized Nodular Hyperplasia</b>                                       | K768 |
| <b>Hepatitis</b>                                                                   | K759 |

### Supplementary Table S3. List of cardiac events

| <b>Event name</b>             | <b>ICD-10</b> |
|-------------------------------|---------------|
| <b>Effort and Rest Angina</b> | I208          |
| <b>Effort Angina</b>          | I208          |
| <b>Microvascular Angina</b>   | I208          |

|                                                          |      |
|----------------------------------------------------------|------|
| <b>Stable Angina</b>                                     | I209 |
| <b>Crescendo Angina</b>                                  | I200 |
| <b>Intermediate Angina</b>                               | I200 |
| <b>Intermediate Coronary Syndrome</b>                    | I200 |
| <b>Worsening Effort Angina</b>                           | I200 |
| <b>Angina Pectoris</b>                                   | I209 |
| <b>Initial Effort Angina</b>                             | I200 |
| <b>Acute Myocardial Infarction</b>                       | I219 |
| <b>Acute Apical Lateral Myocardial Infarction</b>        | I212 |
| <b>Acute Subendocardial Myocardial Infarction</b>        | I214 |
| <b>Posterior Wall Myocardial Infarction</b>              | I219 |
| <b>Acute Lateral Myocardial Infarction</b>               | I212 |
| <b>Acute Anterior Septal Myocardial Infarction</b>       | I210 |
| <b>Acute Anteroapical Myocardial Infarction</b>          | I210 |
| <b>Acute Anterior Myocardial Infarction</b>              | I210 |
| <b>Acute Posterolateral Myocardial Infarction</b>        | I212 |
| <b>Inferior Wall Myocardial Infarction</b>               | I219 |
| <b>Acute Inferoposterior Myocardial Infarction</b>       | I211 |
| <b>Acute Anterolateral Myocardial Infarction</b>         | I210 |
| <b>Right Ventricular Infarction</b>                      | I219 |
| <b>Acute Septal Myocardial Infarction</b>                | I212 |
| <b>Acute Posterior Basal Myocardial Infarction</b>       | I212 |
| <b>Anterior Septal Myocardial Infarction</b>             | I219 |
| <b>Acute Right Ventricular Infarction</b>                | I212 |
| <b>Acute Extensive Anterior Myocardial Infarction</b>    | I210 |
| <b>Myocardial Infarction</b>                             | I219 |
| <b>Acute Inferior Myocardial Infarction</b>              | I211 |
| <b>Acute Posterior Myocardial Infarction</b>             | I212 |
| <b>Acute Inferolateral Myocardial Infarction</b>         | I211 |
| <b>Acute Posterior Septal Myocardial Infarction</b>      | I212 |
| <b>Acute Basal Lateral Myocardial Infarction</b>         | I212 |
| <b>Acute High Lateral Myocardial Infarction</b>          | I212 |
| <b>Anterior Myocardial Infarction</b>                    | I219 |
| <b>Reversible Ischemic Neurologic Deficit</b>            | G459 |
| <b>Transient Ischemic Attack (TIA)</b>                   | G459 |
| <b>Ischemic Stroke</b>                                   | I639 |
| <b>Venous Cerebral Infarction</b>                        | I636 |
| <b>Pontine Infarction</b>                                | I635 |
| <b>Cestan Syndrome</b>                                   | I630 |
| <b>Atherothrombotic Brain Infarction - Chronic Phase</b> | I633 |

|                                                        |      |
|--------------------------------------------------------|------|
| <b>Brainstem Infarction</b>                            | I635 |
| <b>Atherothrombotic Brain Infarction - Acute Phase</b> | I633 |
| <b>Cerebellar Infarction</b>                           | I635 |
| <b>Atherothrombotic Brain Infarction</b>               | I633 |
| <b>Extracranial Major Arterial Thrombosis Stroke</b>   | I630 |
| <b>Cortical Branch Infarction</b>                      | I635 |
| <b>Top of the Basilar Syndrome</b>                     | I635 |
| <b>Cerebral Infarction</b>                             | I639 |
| <b>Cerebrovascular Occlusive Stroke</b>                | I635 |
| <b>Extracranial Main Arterial Embolism Stroke</b>      | I631 |
| <b>Medullary Infarction</b>                            | I635 |
| <b>Cerebral Infarction - Acute Phase</b>               | I639 |
| <b>Extracranial Main Arterial Occlusion Stroke</b>     | I632 |
| <b>Medullary Infarction - Chronic Phase</b>            | I635 |
| <b>Penetrating Branch Infarction</b>                   | I635 |
| <b>Watershed Infarction</b>                            | I638 |
| <b>Embolic Cerebellar Infarction - Chronic Phase</b>   | I634 |
| <b>Embolic Cerebellar Infarction - Acute Phase</b>     | I634 |
| <b>Embolic Cerebellar Infarction</b>                   | I634 |
| <b>Cestan-Chenais Syndrome</b>                         | I630 |
| <b>Thrombotic Cerebellar Infarction</b>                | I633 |
| <b>Pontine Infarction - Acute Phase</b>                | I635 |
| <b>Embolic Stroke - Acute Phase</b>                    | I634 |
| <b>Thrombotic Stroke</b>                               | I633 |
| <b>Embolic Stroke - Chronic Phase</b>                  | I634 |
| <b>Brainstem Infarction - Acute Phase</b>              | I635 |
| <b>Brainstem Infarction - Chronic Phase</b>            | I635 |
| <b>Medullary Infarction - Acute Phase</b>              | I635 |
| <b>Embolic Stroke</b>                                  | I634 |
| <b>Cerebral Infarction - Chronic Phase</b>             | I639 |
| <b>Pontine Infarction - Chronic Phase</b>              | I635 |
